# Supplementary material
Source: PubMed Central journal article supplement (PMC1533780)

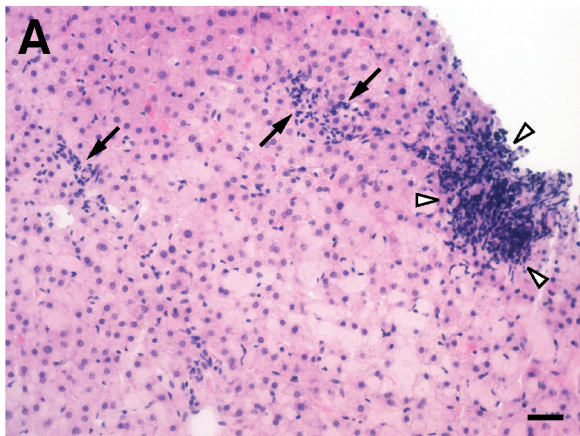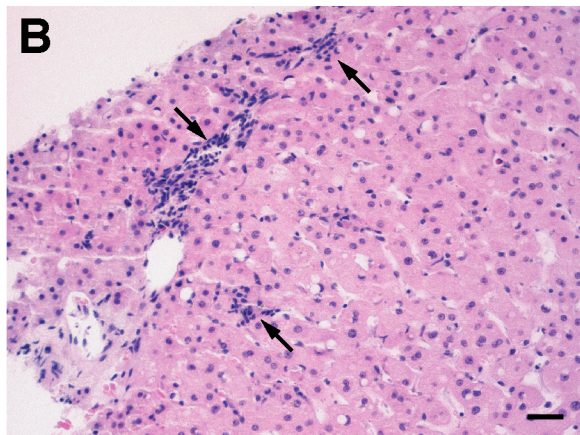

Supplement: pnas_0511218103_1.pdf [file pnas_0511218103_1.pdf]

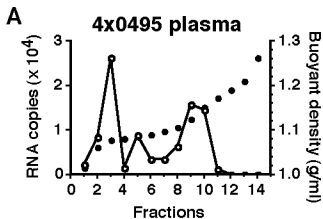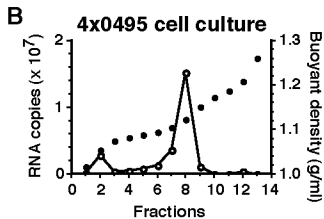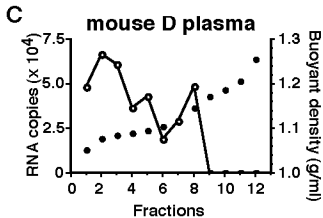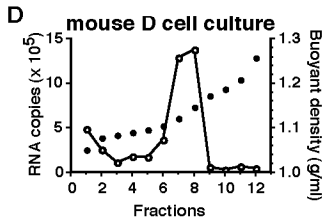

Supplement: pnas_0511218103_2.pdf [file pnas_0511218103_2.pdf]
